# Supplementary material
Source: publisher figshare collection journal article supplement (https://acs.figshare.com/ndownloader/files/3724000)
Supplement: Supplementary file 1 [file 3724000]

## Supporting Information

**Folate Receptor Targeted Delivery of siRNA and Paclitaxel to Ovarian Cancer Cells via Folate Conjugated Triblock Co-polymer to Overcome TLR4 Driven Chemotherapy Resistance**

*Steven K. Jones,<sup>1</sup> Vincent Lizzio,<sup>2,3</sup> and Olivia M. Merkel<sup>1,3\*</sup>*

The synthetic reaction scheme for this project is seen below. It is a multi-step reaction that yields a tri-block copolymer consists of polyethyleneimine-graft-polycaprolactone-block-poly(ethylene glycol) (PEI-g-PCL-*b*-PEG-Fol). In the reaction scheme, m and n refer to different PCL and PEG lengths, respectively.

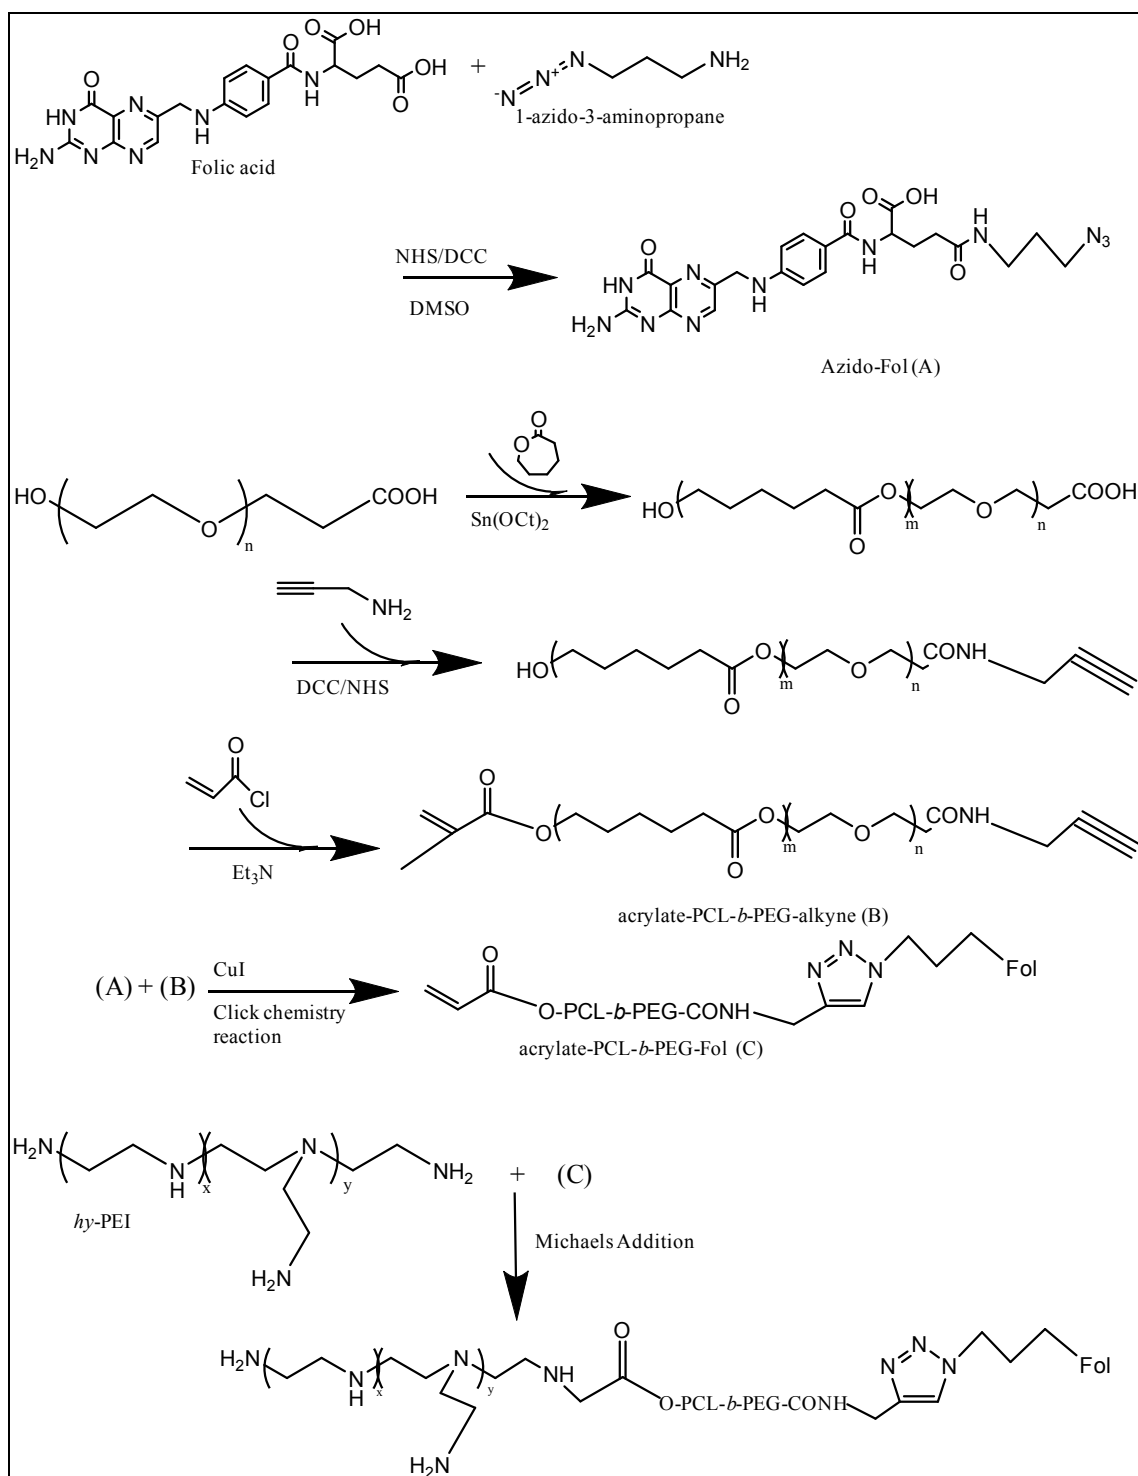

**Supplementary Scheme 1:** Synthetic strategy for PEI-*g*-PCL-*b*-PEG-Fol copolymers.

<sup>1</sup>H NMR for PEI-*g*-PCL-*b*-PEG-Fol copolymers. Samples were run in CDCl<sub>3</sub>.

**A**

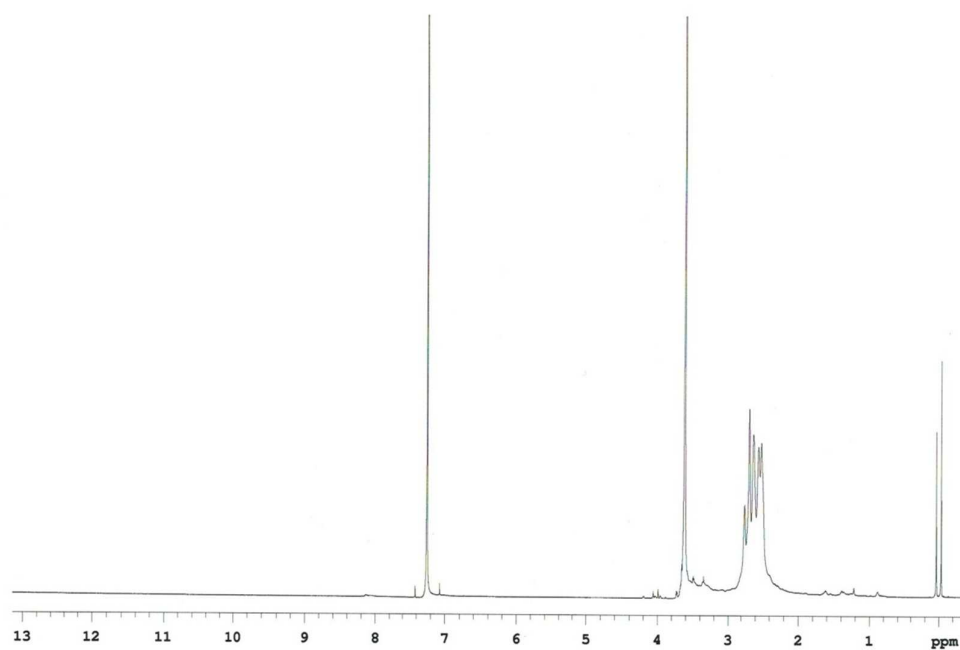

**B**

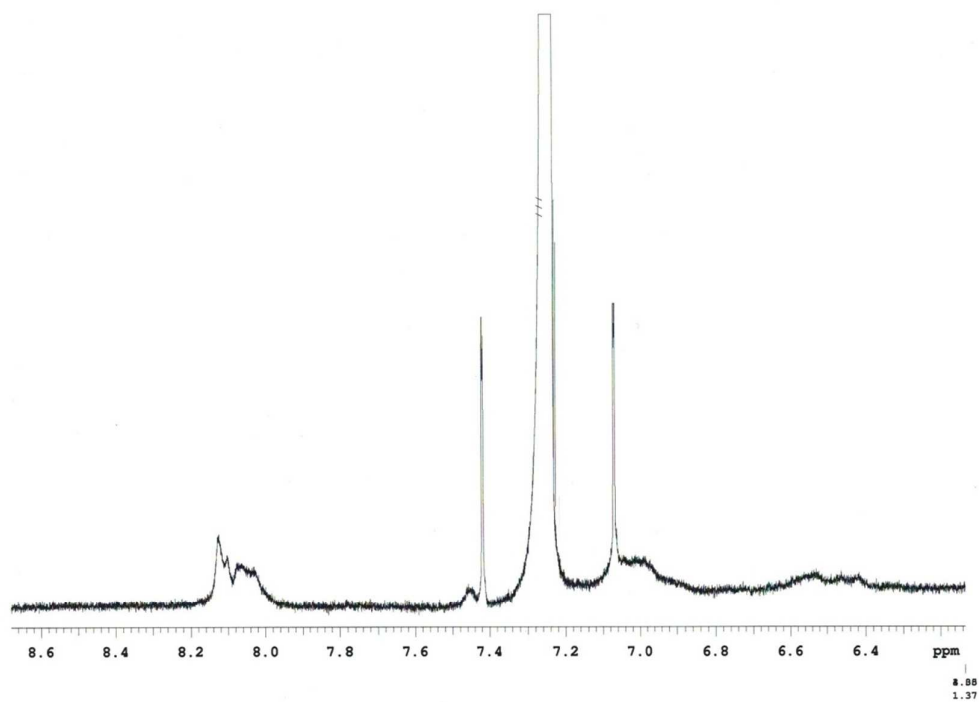

**Supplementary Spectra 1:**  $^1\text{H}$  NMR for A) PEI-*g*-PCL-*b*-PEG-Fol copolymers in  $\text{CDCl}_3$  and B)  $^1\text{H}$  NMR for PEI-*g*-PCL-*b*-PEG-Fol copolymers zoomed in on Folic acid spectra in  $\text{CDCl}_3$ .

An MTT assay was performed to assess the cellular viability of lipofectamine and our folate decorated micelleplexes on SKOV-3 cells. Concentration ranges were from 0-16  $\mu\text{g/mL}$  for all reagents were used, which is a significantly higher concentration than our standard transfection concentrations. Each formulation was transfected for 24 hours.

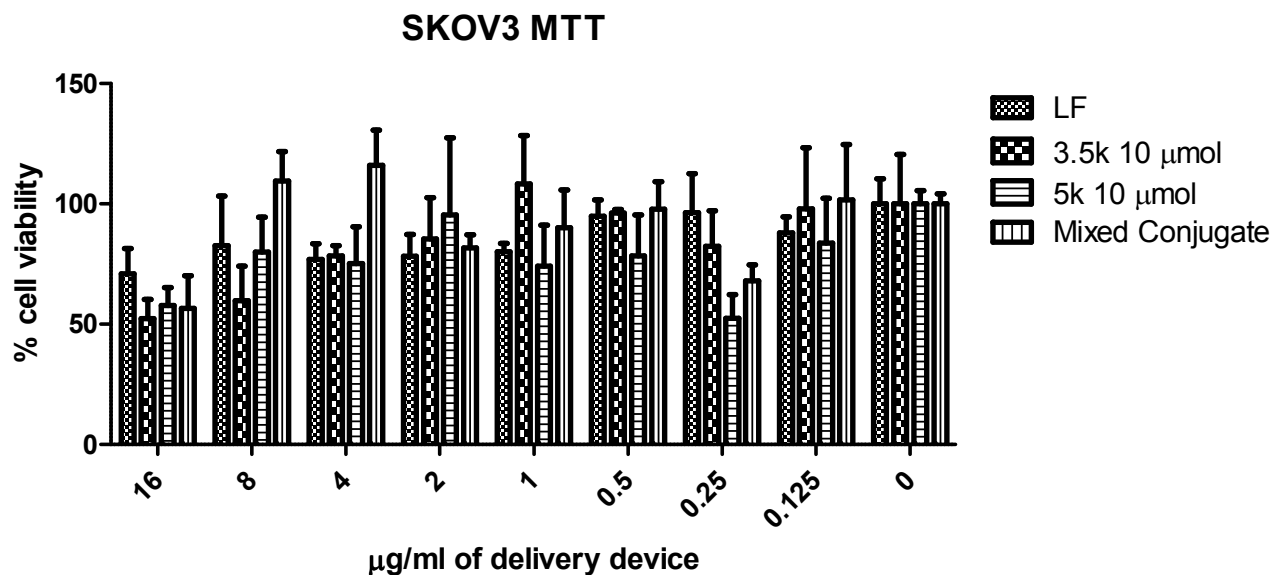

**Supplementary figure 1:** MTT assay of lipofectamine against folate decorated micelleplexes. Concentration ranges were from 0-16  $\mu\text{g/mL}$  and transfected for 24 hours.
